# Supplementary material for: Icariin protects against sodium azide—induced neurotoxicity by activating the PI3K/Akt/GSK-3β signaling pathway
Source: PeerJ. 2020 Apr 20;8:e8955. doi: 10.7717/peerj.8955 (PMC7179568; doi:10.7717/peerj.8955)
Supplement: Supplemental Information 1 [file peerj-08-8955-s001.xlsx]

## Sheet: Sheet1
Fig.1 Protective effect of ICA on PC12 cells injured by NaN3.
1	ICA							NaN3	c	25	50	75	100		ICA
	c	0.01	0.1	1	2.5	5	10		0.969296	0.927785	0.438542	0.0926169	0.036461		c	m	l	z	h
	0.9529	1.1898	1.2745	1.0482	1.0777	1.0539	0.8707		0.975659	0.908494	0.533885	0.0868599	0.0404		1.01951	0.544878	0.637317	0.715366	0.772439
	0.9014	1.1518	1.2116	1.0146	1.0439	1.0553	0.9007		0.949399	0.944147	0.462378	0.110797	0.033835		0.975854	0.601829	0.697927	0.71378	0.824634
	0.9563	1.1571	1.2056	1.0018	1.0195	1.0695	0.8937		0.950914	0.921018	0.470761	0.134835	0.0578729		1.01341	0.746951	0.695488	0.701951	0.842073
	1.0084	1.21334	1.29971	1.06894	1.09902	1.07475	0.887926		1.0207	0.861529	0.475104	0.0884759	0.031209		1.12	0.607412	0.665765	0.677176	0.718353
	1.0455	1.17459	1.23557	1.03467	1.06455	1.07618	0.918519		1.13423	0.905363	0.484901	0.178568	0.043329		0.920706	0.559294	0.638	0.670235	0.686588
	1.0192	1.17999	1.22945	1.02162	1.03967	1.09066	0.911381		1.0109	0.9385	0.543903	0.239602	0.137931		0.933059	0.600706	0.610824	0.708588	0.709176
	1.01336	0.868707	0.809138	0.852586	0.817069	0.78569	0.720517		0.992298	0.875222	0.503377	0.292689	0.142908		1.04141	0.556588	0.623765	0.734	0.712
	1.01647	1.01034	0.978534	0.952414	0.958534	0.927155	0.829655		0.977722	0.898329	0.525655	0.261405	0.146818		1.03682	0.501515	0.540303	0.552273	0.641894
	1.01629	0.928621	1.02871	0.989224	0.973103	0.965517	0.796379		1.01185	0.931034	0.521744	0.248371	0.177272		1.0075	0.469394	0.487803	0.562652	0.62803
	0.971379	1.00966	1.01966	1.00767	0.975517	0.922586	0.906552		1.00711	0.888375	0.528025	0.2492	0.195402		1.01098	0.478182	0.506742	0.554015	0.595909
	1.002	0.908276	0.914276	0.868828	0.885793	0.867793	0.78669		1.09673	0.6946	0.581533	0.431333	0.3294		0.964545	0.512803	0.531439	0.553712	0.5225
	0.994621	1.02131	1.00276	1.03352	0.942138	0.950966	0.938		0.980267	0.746667	0.537067	0.401333	0.2854		1.1432	0.4886	0.4729	0.5226	0.5522
	1.02172	1.05248	1.05041	1.01924	1.00924	0.973517	0.936897		0.945533	0.729933	0.516667	0.392133	0.2858		1.1168	0.4626	0.5138	0.539	0.5676
	0.989103	1.02531	1.07676	1.08531	1.04324	0.972207	0.921724		0.937467	0.7342	0.511333	0.457667	0.297933		0.9985	0.4996	0.4883	0.54	0.61
	0.993475	1.06367	1.09548	0.999902	0.996356	0.984694	0.87281		1.05527	0.754133	0.529533	0.493467	0.302667		1.02159	0.545025	0.579312	0.624668	0.670243
1	95.29	118.98	127.45	104.82	107.77	105.39	87.07		1.00096	0.853708	0.510275	0.25996	0.15904		101.951	54.4878	63.7317	71.5366	77.2439
	90.14	115.18	121.16	101.46	104.39	105.53	90.07								97.5854	60.1829	69.7927	71.378	82.4634
	95.63	115.71	120.56	100.18	101.95	106.95	89.37	1	96.9296	92.7785	43.8542	9.26169	3.6461		101.341	74.6951	69.5488	70.1951	84.2073
	100.84	121.334	129.971	106.894	109.902	107.475	88.7926		97.5659	90.8494	53.3885	8.68599	4.04		112	60.7412	66.5765	67.7176	71.8353
	104.55	117.459	123.557	103.467	106.455	107.618	91.8519		94.9399	94.4147	46.2378	11.0797	3.3835		92.0706	55.9294	63.8	67.0235	68.6588
	101.92	117.999	122.945	102.162	103.967	109.066	91.1381		95.0914	92.1018	47.0761	13.4835	5.78729		93.3059	60.0706	61.0824	70.8588	70.9176
	101.336	86.8707	80.9138	85.2586	81.7069	78.569	72.0517		102.07	86.1529	47.5104	8.84759	3.1209		104.141	55.6588	62.3765	73.4	71.2
	101.647	101.034	97.8534	95.2414	95.8534	92.7155	82.9655		113.423	90.5363	48.4901	17.8568	4.3329		103.682	50.1515	54.0303	55.2273	64.1894
	101.629	92.8621	102.871	98.9224	97.3103	96.5517	79.6379		101.09	93.85	54.3903	23.9602	13.7931		100.75	46.9394	48.7803	56.2652	62.803
	97.1379	100.966	101.966	100.767	97.5517	92.2586	90.6552		99.2298	87.5222	50.3377	29.2689	14.2908		101.098	47.8182	50.6742	55.4015	59.5909
	100.2	90.8276	91.4276	86.8828	88.5793	86.7793	78.669		97.7722	89.8329	52.5655	26.1405	14.6818		96.4545	51.2803	53.1439	55.3712	52.25
	99.4621	102.131	100.276	103.352	94.2138	95.0966	93.8		101.185	93.1034	52.1744	24.8371	17.7272		114.32	48.86	47.29	52.26	55.22
	102.172	105.248	105.041	101.924	100.924	97.3517	93.6897		100.711	88.8375	52.8025	24.92	19.5402		111.68	46.26	51.38	53.9	56.76
	98.9103	102.531	107.676	108.531	104.324	97.2207	92.1724		109.673	69.46	58.1533	43.1333	32.94		99.85	49.96	48.83	54	61
	99.3475	106.367	109.548	99.9902	99.6356	98.4694	87.281		98.0267	74.6667	53.7067	40.1333	28.54		102.159	54.5025	57.9312	62.4668	67.0243
									94.5533	72.9933	51.6667	39.2133	28.58
									93.7467	73.42	51.1333	45.7667	29.7933
									105.527	75.4133	52.9533	49.3467	30.2667
Fig.2 Effects of ICA on LDH leakage rate of NaN3-induced PC12 cell injury									100.096	85.3708	51.0275	25.996	15.904
2	LDH
	103.241	334.373	259.526	116.193	267.775
	106.022	260.737	159.192	240.528	210.887
	99.0506	279.924	157.686	157.955	267.583
	100.441	168.092	351.387	148.544	154.742
	100.589	364.101	155.967	150.133	244.363
	100.081	331.867	147.367	143.783	155.698
	106.617	331.867	221.836	226.892	146.817
	95.1081	219.098	170.42	211.827	227.536
	100.773	210.099	148.481	157.13	204.407
	103.741	366.728	343.107	340.028	158.741
	98.4491	334.375	320.818	328.355	210.754
	99.1667	350.551	331.962	334.191	246.69
Fig.4 Effects of ICA on glucose contents in NaN3-induced PC12 cell injury.
glucose
	100.515	212.171	107.912	91.5878	98.9882
	101.794	236.715	186.373	150.604	140.229
	96.3606	260.232	181.328	169.986	133.838
	99.7809	294.431	212.122	144.104	129.603
	108.327	232.099	264.289	229.501	148.21
Fig.5 Effect of ICA on PI3K/Akt/GSK-3β signaling pathway in NaN3-induced PC12 cell.							Fig.6 Effect of ICA on the protein phosphorylation level of Tau in NaN3-induced PC12 cell injury.
pi3k110	102.055	74.9787	60.7718	66.0173	96.1775		pik3-p85	97.1075	80.0603	92.508	110.731	122.947
	118.933	76.8441	102.696	106.887	108.905			99.9007	89.5208	87.9063	89.656	86.9029
	101.755	60.1229	94.7775	94.3728	83.7542			100.062	63.3776	84.1733	75.6158	101.452
	102.226	64.5401	56.9678	73.025	103.241			100.117	75.7409	93.3383	81.627	104.889
	100.933	73.4966	75.6788	77.0667	107.607
AKT	110.024	34.9294	73.1879	68.3298	83.8896
	100.12	58.9013	65.5248	68.4364	107.018
	90.0162	45.0473	46.5215	56.3905	58.679
	100.152	36.4005	38.6015	48.886	46.23
	101.57	55.1879	75.4733	118.066	149.703
GSK	109.353	85.8637	100.201	111.018	114.355
	101.721	73.5798	94.7527	82.3204	105.153
	107.585	94.2987	109.168	104.259	96.3571
	106.01	79.2735	90.8055	104.254	108.376
PHF	102.202	119.556	88.2698	64.3733	42.3922		p-t217	104.299	160.016	149.906	136.145	133.382
	106.357	157.51	145.38	133.713	137.336			103.674	133.051	124.336	132.029	90.659
	94.1691	130.305	112.047	114.909	76.995			101.636	132.599	123.696	101.685	96.4808
	106.158	144.167	138.749	134.418	107.074			103.395	132.93	112.472	106.897	103.03
	96.7632	173.757	130.657	124.219	125.57			115.207	115.975	123.94	113.235	101.616
	101.404	268.567	193.002	195.578	115.452			103.164	119.09	116.698	113.286	120.055
